# Supplementary material for: Identification and validation of lncRNAs involved in m6A regulation for patients with ovarian cancer
Source: PubMed Central journal article supplement (PMC8268297; doi:10.1186/s12935-021-02076-7), 2021-07-08

Strata High Low

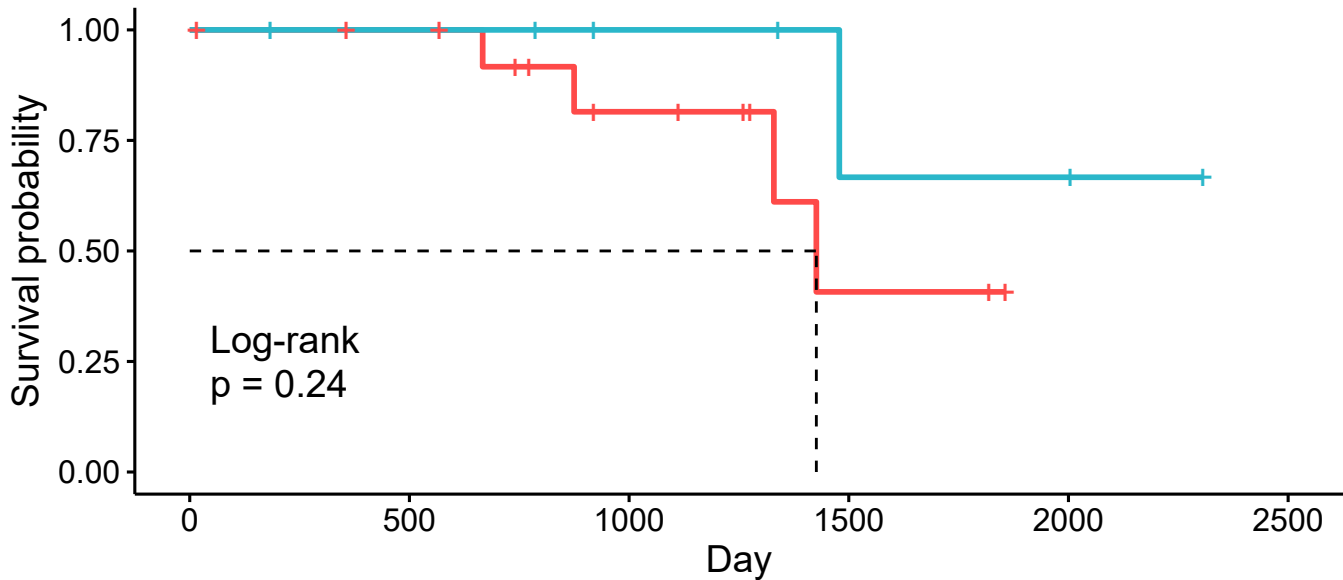

Number at risk

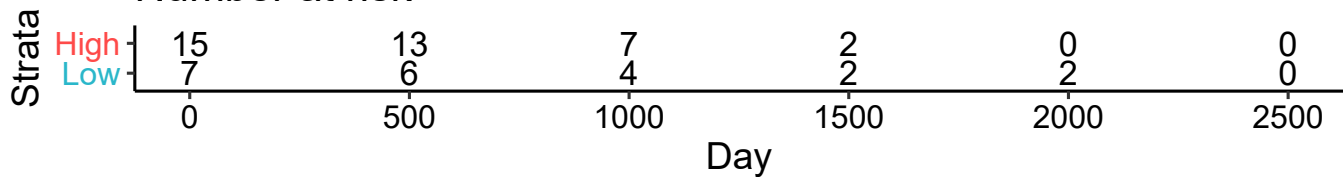

Supplement: 12935_2021_2076_MOESM2_ESM.pdf [file 12935_2021_2076_MOESM2_ESM.pdf]
